# Supplementary material for: Increased temperatures may safeguard the nutritional quality of crops under future elevated CO 2 concentrations
Source: PubMed Central journal article supplement (PMC6850270; doi:10.1111/tpj.14166), 2019-01-18

Figure S1

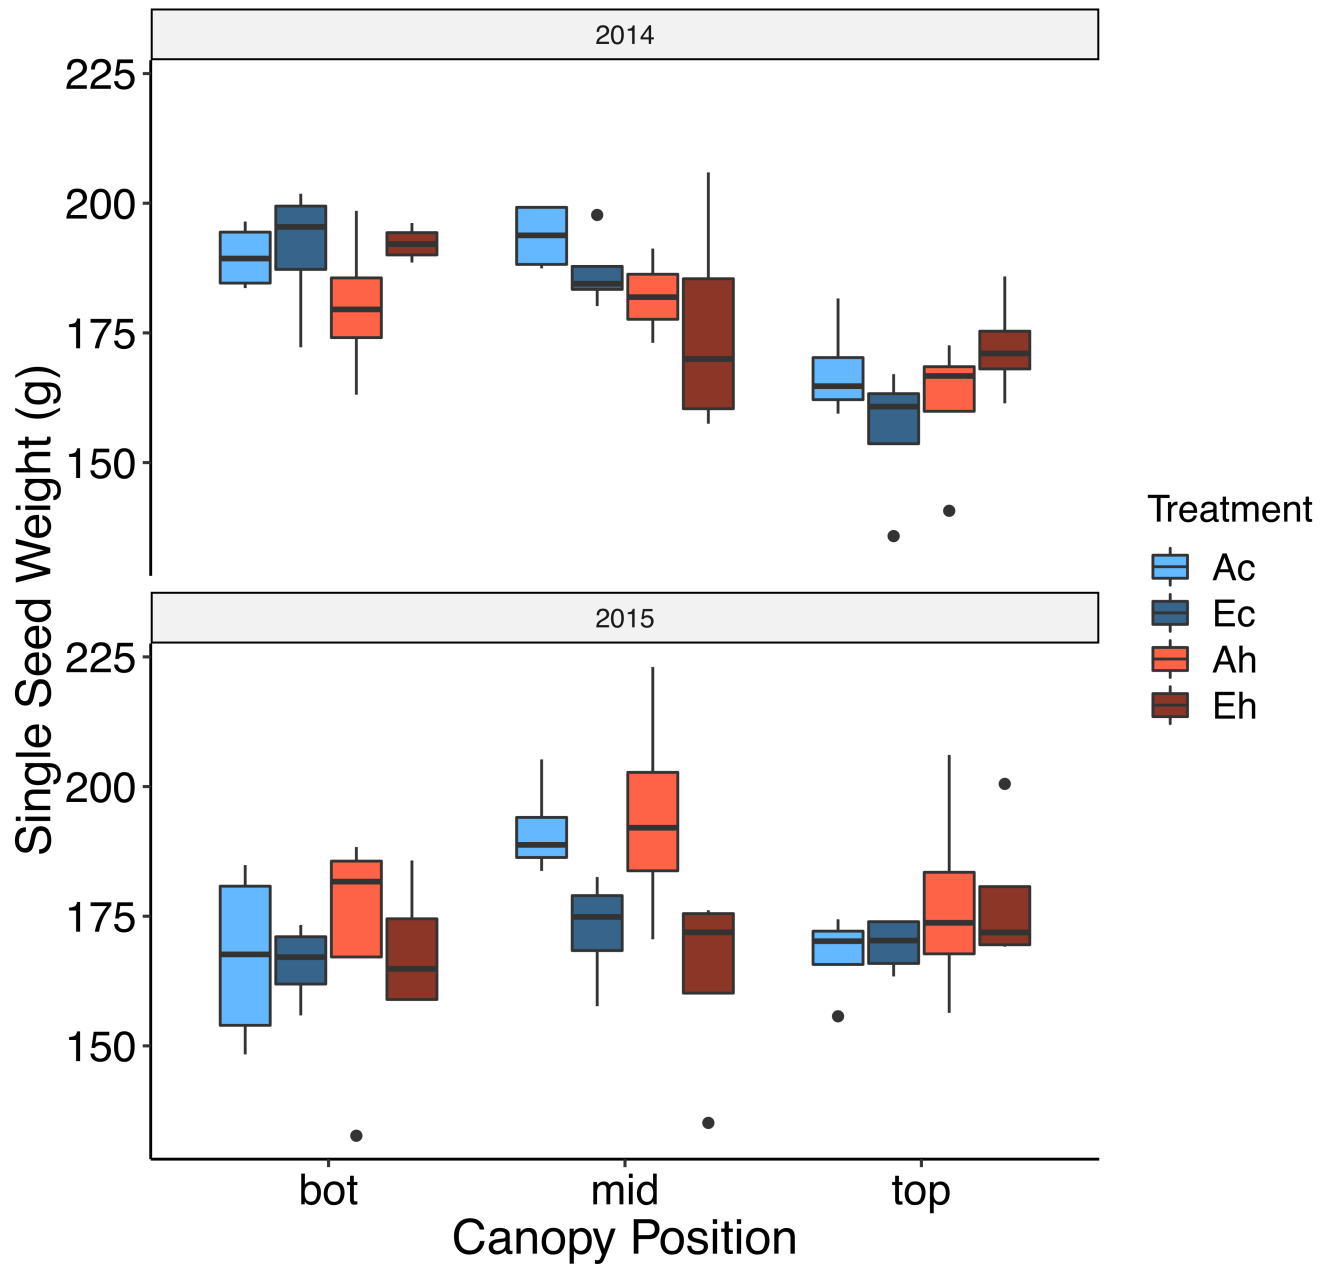

Supplement: TPJ-97-872-s001.pdf [file TPJ-97-872-s001.pdf]
